# Supplementary material for: Severe organising pneumonia following COVID-19
Source: HighWire-hosted journal article supplement (doi:10.1136/thoraxjnl-2020-216088), 2020-11-11
Supplement: thoraxjnl-2020-216088supp001_data_supplement.pdf [file thoraxjnl-2020-216088supp001_data_supplement.pdf]

### Severe organising pneumonia following COVID-19

István Vadász MD<sup>1,2,3</sup>, Faeq Husain-Syed MD<sup>1</sup>, Peter Dorfmueller MD, PhD<sup>2,3,4</sup>, Fritz C. Roller MD<sup>5</sup>, Khodr Tello MD<sup>1,2,3</sup>, Matthias Hecker MD, PhD<sup>1,2</sup>, Rory E. Morty PhD<sup>1,2,3,6</sup>, Stefan Gattenlöhner MD<sup>2,3,4</sup>, Hans-Dieter Walmrath MD<sup>1</sup>, Friedrich Grimminger MD, PhD<sup>1,2,3,7</sup>, Susanne Herold MD, PhD<sup>1,2,3</sup>, Werner Seeger MD<sup>1,2,3,6,7</sup>

<sup>1</sup>Department of Internal Medicine, University Hospital Giessen, Justus Liebig University Giessen, Klinikstrasse 33, 35392 Giessen, Germany

<sup>2</sup>Universities of Giessen and Marburg Lung Center (UGMLC), Member of the German Center for Lung Research (DZL), Klinikstrasse 33, 35392 Giessen, Germany

<sup>3</sup>The Cardio-Pulmonary Institute (CPI), Aulweg 130, 35392 Giessen, Germany

<sup>4</sup>Institute of Pathology, University Hospital Giessen, Justus Liebig University Giessen, Langhansstrasse 10, 35392 Giessen, Germany

<sup>5</sup>Department of Radiology, University Hospital Giessen, Justus Liebig University Giessen, Klinikstrasse 33, 35392 Giessen, Germany

<sup>6</sup>Max Planck Institute for Heart and Lung Research, Department of Lung Development and Remodeling, Ludwigstrasse 43, 61231 Bad Nauheim, Germany

<sup>7</sup>Institute for Lung Health (ILH), Justus Liebig University Giessen, Klinikstrasse 33, 35392 Giessen, Germany

Correspondence to:

István Vadász, MD

Department of Internal Medicine, University Hospital Giessen, Justus Liebig University Giessen, Universities of Giessen and Marburg Lung Center, Member of the German Center for Lung Research and The Cardio-Pulmonary Institute

Klinikstrasse 33, 35392 Giessen, Germany

Tel: +49 641 985 42354, Fax: +49 641 985 42359

Email: [istvan.vadasz@innere.med.uni-giessen.de](mailto:istvan.vadasz@innere.med.uni-giessen.de)

## Supplementary material

### Supplementary tables

#### *Supplementary table 1: Characteristics of three patients diagnosed with organising pneumonia secondary to COVID-19.*

|                                           | Patient 1              | Patient 2          | Patient 3                   |
|-------------------------------------------|------------------------|--------------------|-----------------------------|
| <b>Demographics</b>                       |                        |                    |                             |
| Sex                                       | Male                   | Male               | Male                        |
| Age, years                                | 57                     | 70                 | 76                          |
| Body mass index, kg/m <sup>2</sup>        | 29.4                   | 23.2               | 24.7                        |
| <b>Comorbidities</b>                      |                        |                    |                             |
|                                           | Hypertension, diabetes | Hypertension, COPD | Hypertension, diabetes, CAD |
| <b>Laboratory findings</b>                |                        |                    |                             |
| White cell count, g/L                     | 7.1                    | 9.6                | 11.9                        |
| Total lymphocytes                         | 1.54                   | 0.87               | 0.36                        |
| Haemoglobin, g/dL                         | 84                     | 131                | 105                         |
| Platelet count, giga/L                    | 316                    | 233                | 287                         |
| Creatinine, mg/dL <sup>†</sup>            | 0.5                    | 0.9                | 1.2                         |
| Urea, mg/dL <sup>‡</sup>                  | 37                     | 111                | 86                          |
| Lactate dehydrogenase, U/L                | 311                    | 393                | 301                         |
| Alanine aminotransferase, U/L             | 104                    | 81                 | 38                          |
| Aspartate aminotransferase, U/L           | 44                     | 108                | 56                          |
| Albumin, g/L                              | 24.9                   | 33.6               | 31.0                        |
| B-type natriuretic peptide, pg/mL         | 48                     | 65                 | 142                         |
| C-reactive protein, mg/L                  | 71.1                   | 58.1               | 212.4                       |
| Procalcitonin, µg/L                       | 0.5                    | 0.7                | 0.5                         |
| Interleukin-6, µg/L                       | 74                     | 334                | 280                         |
| Ferritin, µg/L                            | 1588                   | 524                | 1059                        |
| D-dimer, mg/L                             | 3.1                    | 4.3                | 0.69                        |
| <b>Clinical characteristics</b>           |                        |                    |                             |
| SAPS II                                   | 37                     | 39                 | 57                          |
| SOFA score                                | 7                      | 6                  | 7                           |
| <b>V<sub>T</sub>, mL/kg PBW</b>           |                        |                    |                             |
| 24 h post-intubation                      | 6.1                    | 6.2                | 6.2                         |
| 2 weeks post-intubation                   | 6.3                    | 5.9                | 5.8                         |
| At time point of OP diagnosis             | 5.6                    | 6.1                | 5.4                         |
| 2 weeks after CS initiation               | 6.2                    | SB                 | 6.7                         |
| <b>RR, breaths/min</b>                    |                        |                    |                             |
| 24 h post-intubation                      | 26                     | 20                 | 15                          |
| 2 weeks post-intubation                   | 22                     | 18                 | 19                          |
| At time point of OP diagnosis             | 30                     | 22                 | 26                          |
| 2 weeks after CS initiation               | 16                     | SB                 | 15                          |
| <b>P<sub>PLAT</sub>, cmH<sub>2</sub>O</b> |                        |                    |                             |

|                                          |       |        |       |
|------------------------------------------|-------|--------|-------|
| <i>24 h post-intubation</i>              | 28    | 25     | 24    |
| <i>2 weeks post-intubation</i>           | 24    | 19     | 16    |
| <i>At time point of OP diagnosis</i>     | 30    | 30     | 20    |
| <i>2 weeks after CS initiation</i>       | 13    | SB     | 14    |
| PEEP, cmH <sub>2</sub> O                 |       |        |       |
| <i>24 h post-intubation</i>              | 12    | 11     | 12    |
| <i>2 weeks post-intubation</i>           | 8     | 9      | 7     |
| <i>At time point of OP diagnosis</i>     | 10    | 12     | 5     |
| <i>2 weeks after CS initiation</i>       | 5     | SB     | 5     |
| Driving pressure, cmH <sub>2</sub> O     |       |        |       |
| <i>24 h post-intubation</i>              | 18    | 14     | 12    |
| <i>2 weeks post-intubation</i>           | 16    | 10     | 9     |
| <i>At time point of OP diagnosis</i>     | 20    | 18     | 15    |
| <i>2 weeks after CS initiation</i>       | 8     | SB     | 9     |
| Compliance, mL/mbar                      |       |        |       |
| <i>24 h post-intubation</i>              | 38.4  | 42.7   | 41.2  |
| <i>2 weeks post-intubation</i>           | 52.3  | 65.3   | 54.4  |
| <i>At time point of OP diagnosis</i>     | 18.4  | 22.5   | 26.2  |
| <i>2 weeks after CS initiation</i>       | 57.5  | SB     | 55.6  |
| PaO <sub>2</sub> /FiO <sub>2</sub> ratio |       |        |       |
| <i>24 h post-intubation</i>              | 98.2  | 185.2  | 194.8 |
| <i>2 weeks post-intubation</i>           | 175.5 | 261.1  | 240.0 |
| <i>At time point of OP diagnosis</i>     | 153.3 | 197.7  | 208.3 |
| <i>2 weeks after CS initiation</i>       | 308.2 | 385.7* | 347.6 |
| ARDS adjuvant therapy                    |       |        |       |
| Prone positioning                        | Yes   | Yes    | Yes   |
| Nitric oxide                             | Yes   | No     | Yes   |
| ECCO <sub>2</sub> R                      | Yes   | No     | No    |
| LVEF, %                                  | 60    | 60     | 55    |

†To convert the values for serum creatinine to mg/dL, multiply by 88.4.

‡To convert the value for urea to blood urea nitrogen, multiply by 0.467.

\*Spontaneously breathing at room air (FiO<sub>2</sub> 0.21%).

CAD, coronary artery disease; COPD, chronic obstructive pulmonary disease; COVID-19, coronavirus disease 2019; CS, corticosteroid; ECCO<sub>2</sub>R, extracorporeal carbon dioxide removal; FiO<sub>2</sub>, fraction of inspired oxygen; ICU, intensive care unit; LVEF, left ventricular ejection fraction; OP, organising pneumonia; PaO<sub>2</sub>, arterial partial pressure of oxygen; PBW, predicted body weight; PEEP, positive end-expiratory pressure; P<sub>PLAT</sub>, plateau pressure; RR, respiratory rate; SAPS, Simplified Acute Physiology Score; SB, spontaneously breathing; SOFA, Sequential Organ Failure Assessment

### **Legend to Supplementary figures**

#### ***Supplementary figure 1: Initial and follow-up chest x-ray of a patient with severe***

**COVID-19.** (A) Initial chest x-ray of a 57-year old male patient presenting with COVID-19 showing extensive ground-glass opacification in both lower lobes and the left midfield (black asterisk). A follow-up chest x-ray (B) three weeks later upon clinical deterioration and

markedly decreasing pulmonary compliance showing extensive consolidations (black asterisk) in both lower lobes with positive bronchoaerogram and bronchiectasis (black arrow).

***Supplementary figure 2: Histology of a transbronchial biopsy from the same patient upon pulmonary deterioration.*** HE stainings at a magnification of 40x and 200x are shown.

**(A)** Overview of the pulmonary parenchyma with cell-rich interstitial infiltrate (thickening of alveolar septa) that is more prominent on the left side. Scale bar corresponds to 200  $\mu\text{m}$ .

**(B)** Interstitial inflammatory infiltrate, featuring mostly CD3+ lymphocytes (immunostainings not shown), but also scattered neutrophils (N) and eosinophils (E) with fibrinous leakage and bleeding into the alveoli (arrows). Scale bar corresponds to 50  $\mu\text{m}$

#### **Legend to Supplementary videos**

***Supplementary video 1: Colour-coded 3-D volume rendering technique (VRT) showing organising pneumonia following COVID-19.*** As shown in the transversal color-coded image, the blue coloured areas represent lung tissue with normal lung density on a Hounsfield unit scale, whereas green and red/white coloured areas represent lung tissue changes with increased density values due to ground-glass opacification and consolidations/fibrotic changes, respectively. The lower lobes show marked fibrotic pattern with extensive secondary volume loss.

***Supplementary video 2: Follow-up colour-coded 3-D VRT showing partial recovery from organising pneumonia post COVID-19 upon corticosteroid therapy.*** Follow-up approximately eight weeks after initiation of corticosteroid therapy, showing partially recovery, suggesting less extensive opacification and consolidations.
