# Supplementary figures and images for: Severe organising pneumonia following COVID-19
Source: HighWire-hosted journal article supplement (doi:10.1136/thoraxjnl-2020-216088), 2020-11-11

Supplementary figure 1

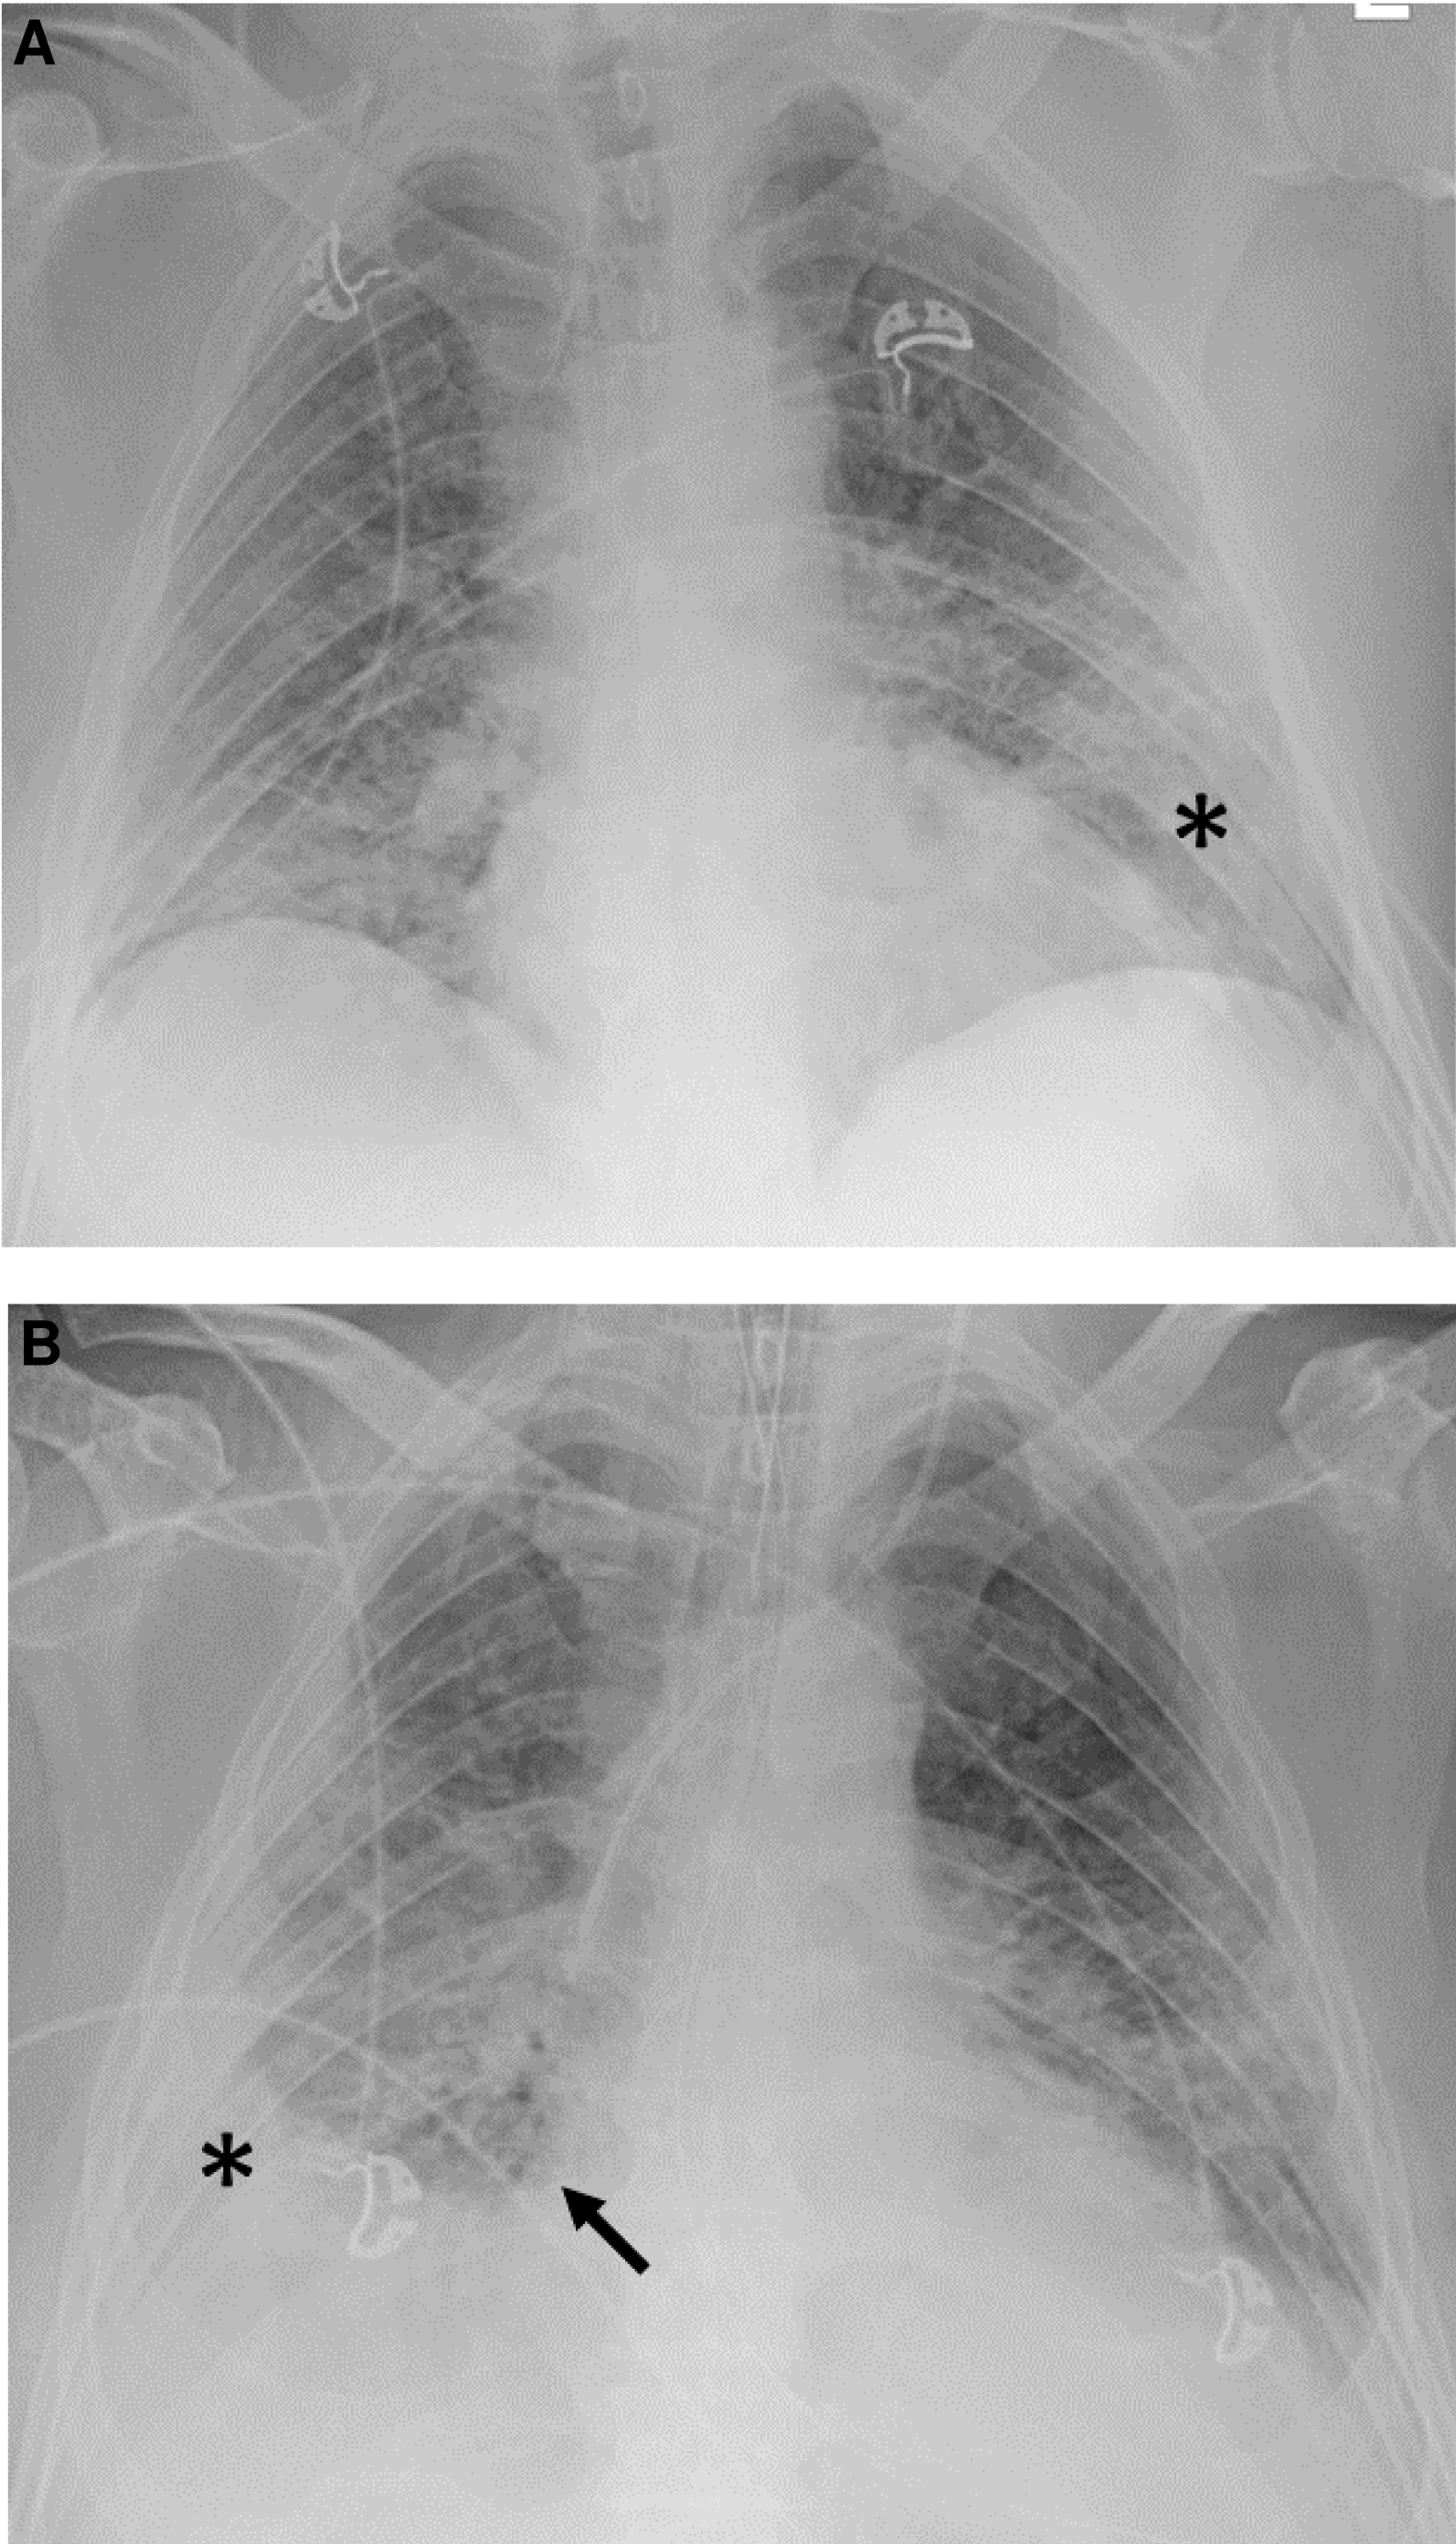

Supplement: thoraxjnl-2020-216088supp002_data_supplement.pdf [file thoraxjnl-2020-216088supp002_data_supplement.pdf]
